# Supplementary material for: A ferrocene-based heteroditopic ligand for electrochemical sensing of cations and anions
Source: Royal Society of Chemistry journal article supplement (doi:10.1039/b419082c), 2005-01-01
Supplement: b419082c.pdf [file b419082c.pdf]

## **A Ferrocene-Based Heteroditopic Ligand for Electrochemical Sensing of Cations and Anions**

Francisco Otón, Alberto Tárraga,\* María D. Velasco and Pedro Molina\*

### **Electronic Supplementary Information (ESI)**

#### **General Electrochemistry**

All electrochemical experiments were performed with a QUICELTRON potentiostat/galvanostat controlled by a personal computer and driven by dedicated software. Electrochemical experiments were conducted in a conventional three-electrode cell under a nitrogen atmosphere at 25 °C. The working electrode was a Pt disk (1 mm in diameter) polished before each recording. The auxiliary electrode was a platinum wire. The reference electrode was SCE . All potentials are quoted with respect to  $\text{Fc}^+/\text{Fc}$ . The experiments were carried out in dichloromethane solutions containing 0.1 M of  $\text{Bu}_4\text{NClO}_4$  as supporting electrolyte and under these experimental conditions, the ferrocenium/ferrocene couple was observed at +0.405 V *vs* SCE. Deoxygenation of the solutions was achieved by bubbling nitrogen for at least 10 min and the working electrode was cleaned after each run. Cyclic voltammetry (CV) curves were recorded at a scan rate of 0.1 V s<sup>-1</sup> and the differential pulse voltammtery (DPV) curves were recorded at a 4 mV s<sup>-1</sup> scan rate with a pulse height of 50 mV and a step time of 50 ms<sup>1</sup>.

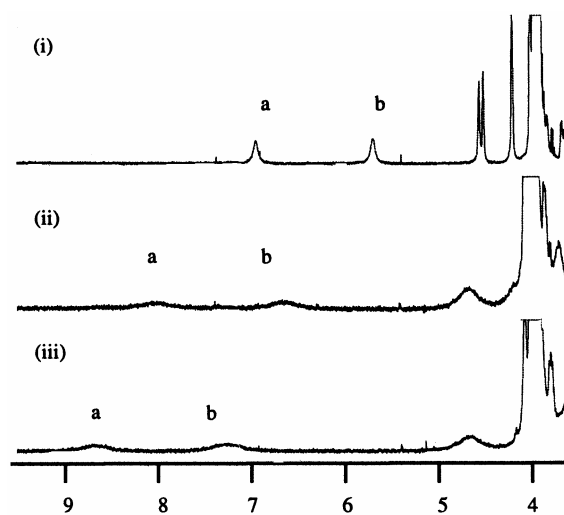

**Fig. S1.** Evolution of the <sup>1</sup>H-NMR spectra of **1** upon addition of increasing amounts of F<sup>-</sup> anion: (i) **1**; (ii) **1**+0.5 eq F<sup>-</sup>; (iii) **1**+1 eq F<sup>-</sup>.

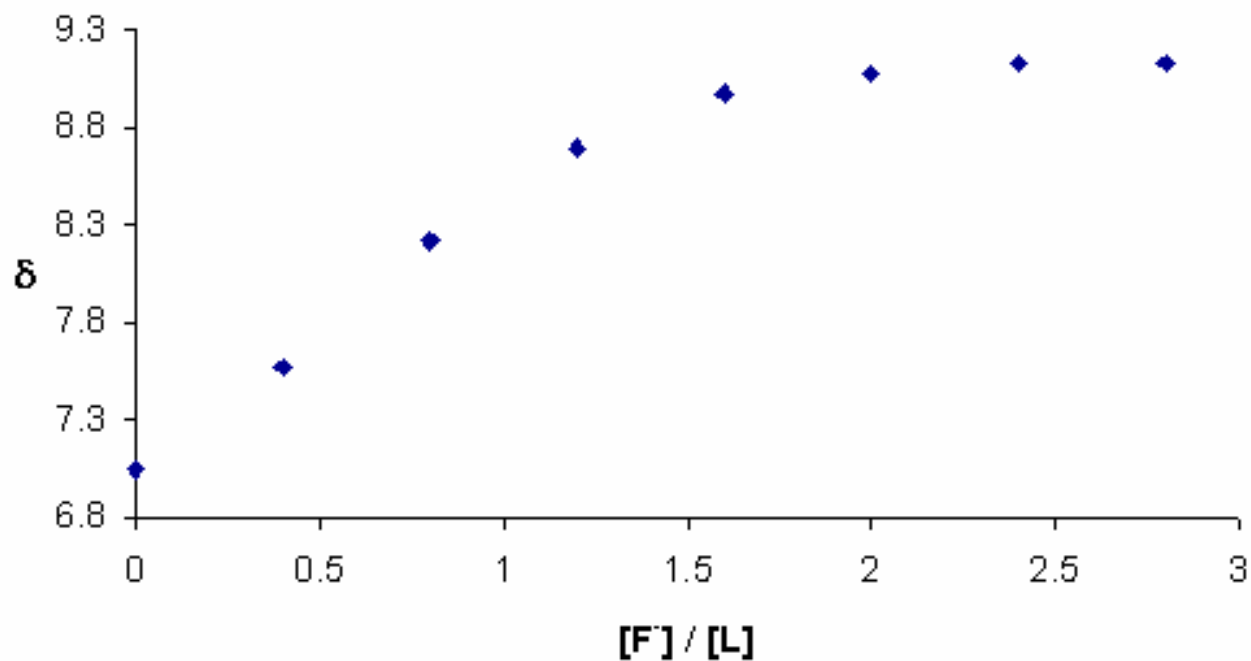

**Fig. S2:** Changes in the chemical shifts of the NH protons of **1** upon addition of  $n\text{Bu}_4\text{NF}$ .

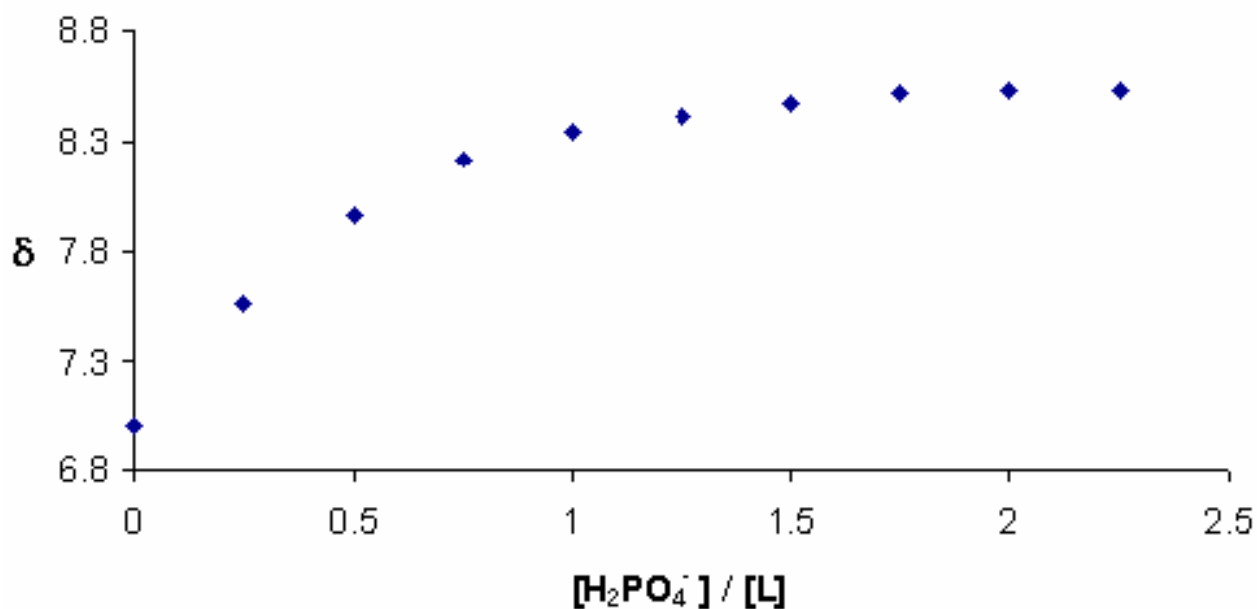

**Fig. S3:** Changes in the chemical shifts of the NH protons of **1** upon addition of  $n\text{Bu}_4\text{NH}_2\text{PO}_4$ .

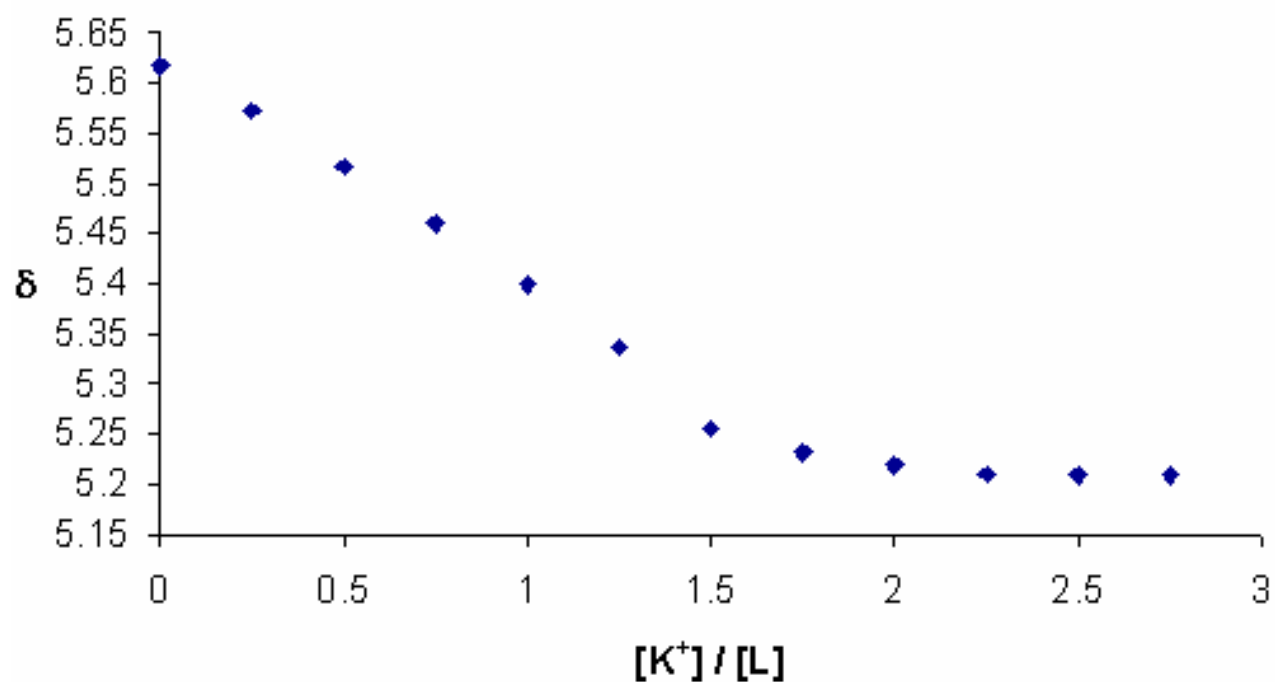

**Fig. S4:** Changes in the chemical shifts of the NH protons of **1** upon addition of KClO<sub>4</sub>.

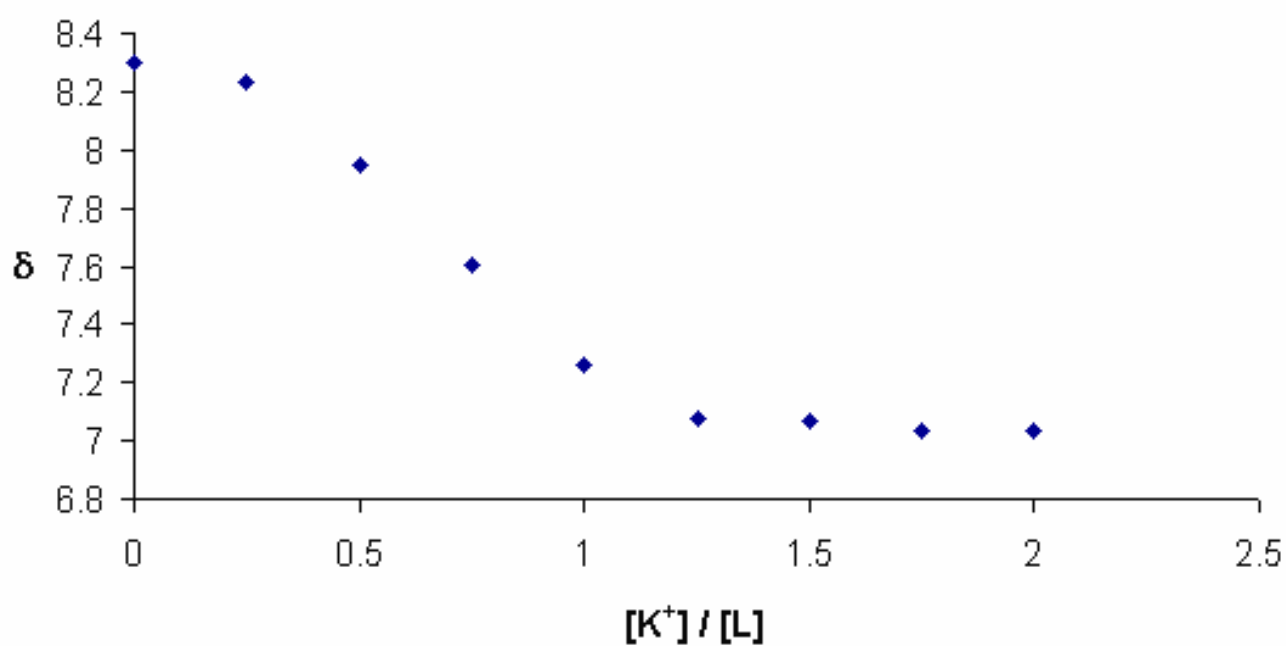

**Fig. S5:** Changes in the chemical shifts of the NH protons of [**1**•H<sub>2</sub>PO<sub>4</sub><sup>-</sup>] upon addition of KClO<sub>4</sub>.

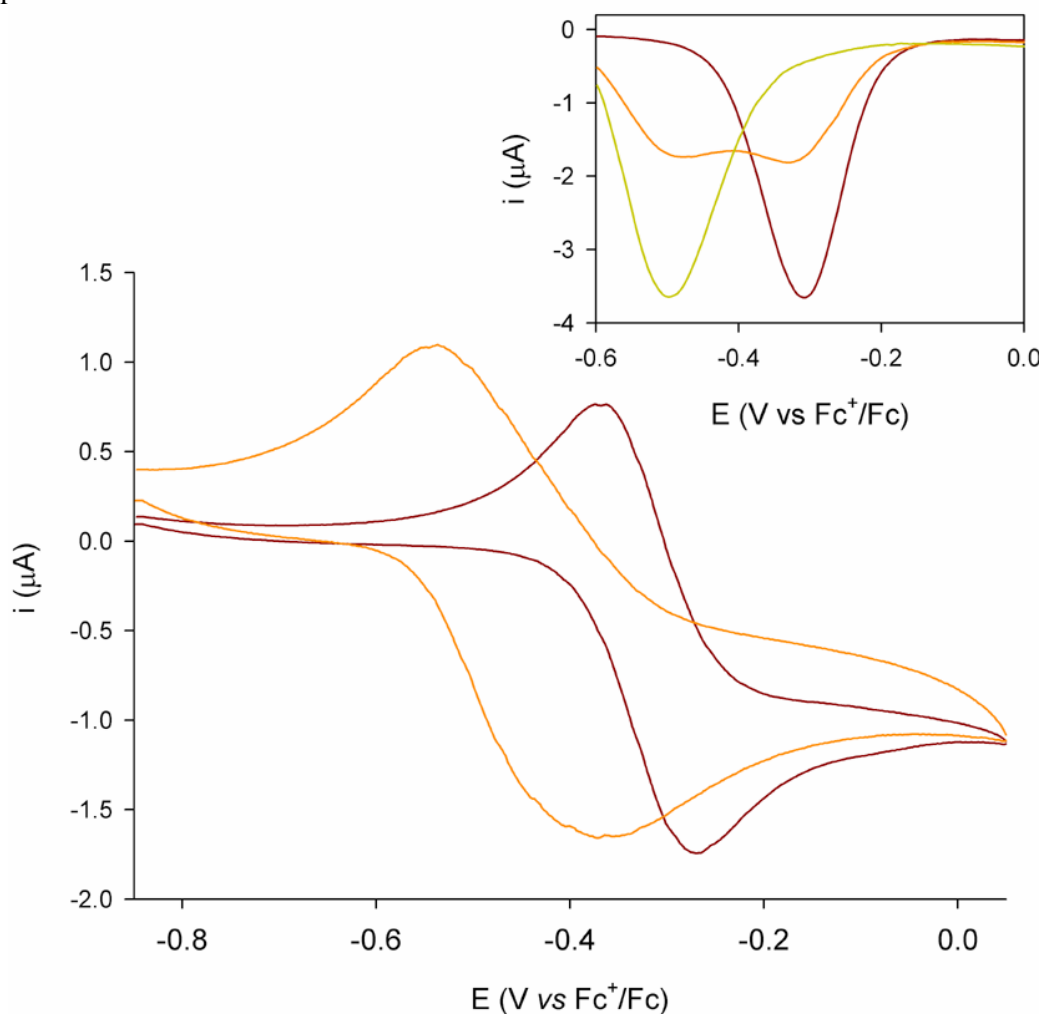

**Fig. S6:** CV response of compound **1** (1mM) in  $\text{CH}_2\text{Cl}_2$  before (brown) and after addition of 2 equivalents of  $\text{H}_2\text{PO}_4^-$  (orange). Scan rate:  $0.1 \text{ V s}^{-1}$ . Upper inset DPV response : **1** (brown); **1** + 1 equivalents of  $\text{H}_2\text{PO}_4^-$  (orange); **1** + 2 equivalents of  $\text{H}_2\text{PO}_4^-$  (green); Scan rate:  $0.004 \text{ V s}^{-1}$ , pulse width: 50 ms, amplitude: 50 mV

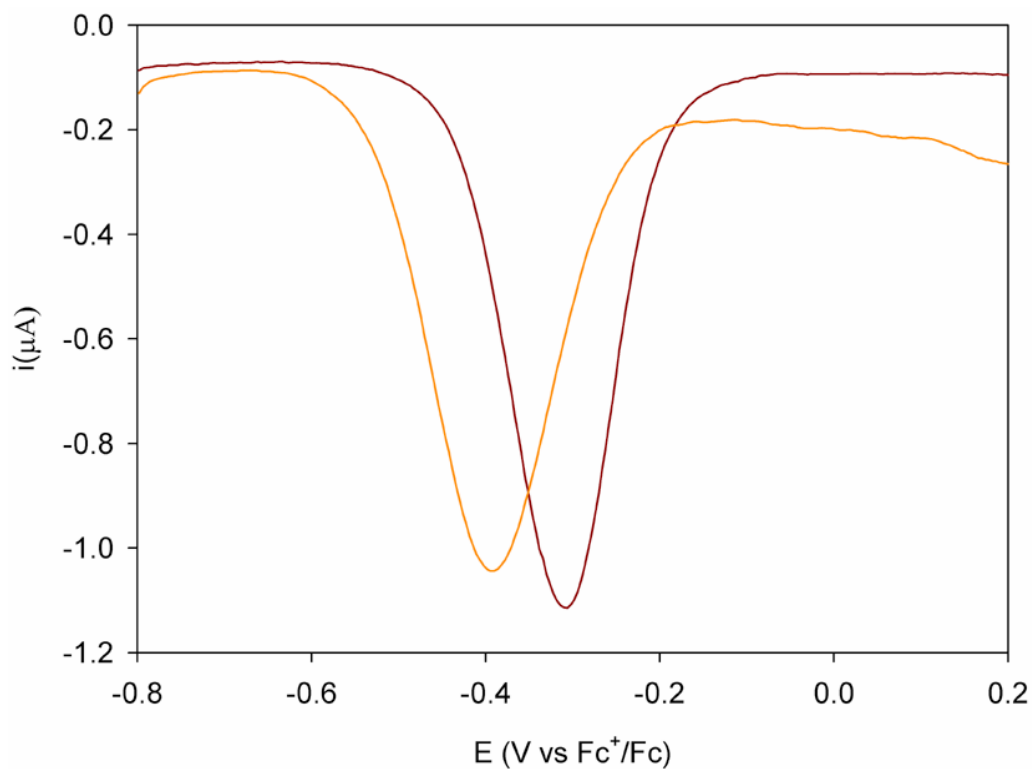

**Fig. S7:** Voltammetric response of compound **1** (1mM) in  $\text{CH}_2\text{Cl}_2$  before (brown) and after addition of 1.5 equivalents of  $\text{F}^-$  (orange). Scan rate: 0.004  $\text{V s}^{-1}$ , pulse width: 50 ms, amplitude: 50 mV
